# Supplementary material for: Effect of a ketogenic diet on hepatic steatosis and hepatic mitochondrial metabolism in nonalcoholic fatty liver disease
Source: PubMed Central journal article supplement — Proc Natl Acad Sci U S A. 2020 Mar 16;117(13):7347–54. doi: 10.1073/pnas.1922344117 (PMC7132133; doi:10.1073/pnas.1922344117), 2020-03-16
Supplement: pnas.1922344117.sapp.pdf [file pnas.1922344117.sapp.pdf]

**SI Appendix: Effect of a ketogenic diet on hepatic steatosis and hepatic mitochondrial metabolism in nonalcoholic fatty liver disease**

Panu K. Luukkonen<sup>a,b,c</sup>, Sylvie Dufour<sup>a,d</sup>, Kun Lyu<sup>e</sup>, Xian-Man Zhang<sup>a,d</sup>,  
Antti Hakkarainen<sup>f,g</sup>, Tiina E. Lehtimäki<sup>f</sup>, Gary W. Cline<sup>a,d</sup>, Kitt Falk Petersen<sup>a,d</sup>,  
Gerald I. Shulman<sup>a,d,e,1,2</sup>, Hannele Yki-Järvinen<sup>b,c,1,2</sup>

<sup>a</sup>*Department of Internal Medicine, Yale School of Medicine, New Haven, CT 06520, USA*

<sup>b</sup>*Minerva Foundation Institute for Medical Research, Helsinki 00290, Finland*

<sup>c</sup>*Department of Medicine, University of Helsinki and Helsinki University Hospital, Helsinki 00290, Finland*

<sup>d</sup>*Yale Diabetes Research Center, Yale School of Medicine, New Haven, CT 06520, USA*

<sup>e</sup>*Department of Cellular & Molecular Physiology, Yale School of Medicine, New Haven, CT 06520, USA*

<sup>f</sup>*Department of Radiology, HUS Medical Imaging Center, University of Helsinki and Helsinki University Hospital, Helsinki 00290, Finland*

<sup>g</sup>*Department of Neuroscience and Biomedical Engineering, Aalto University School of Science, Espoo 00076, Finland*

<sup>1</sup>*Co-Senior Author*

<sup>2</sup>*Co-Corresponding Author*

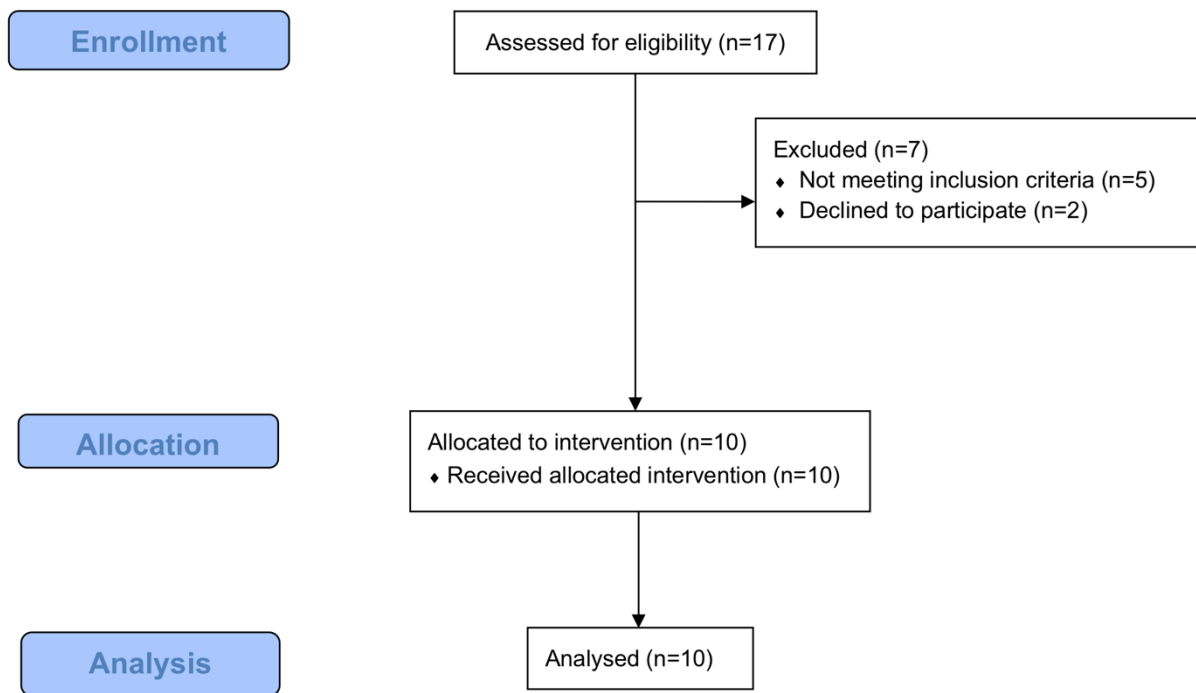

**Figure S1.** Flow chart of enrollment and allocation of study subjects and analysis of data.

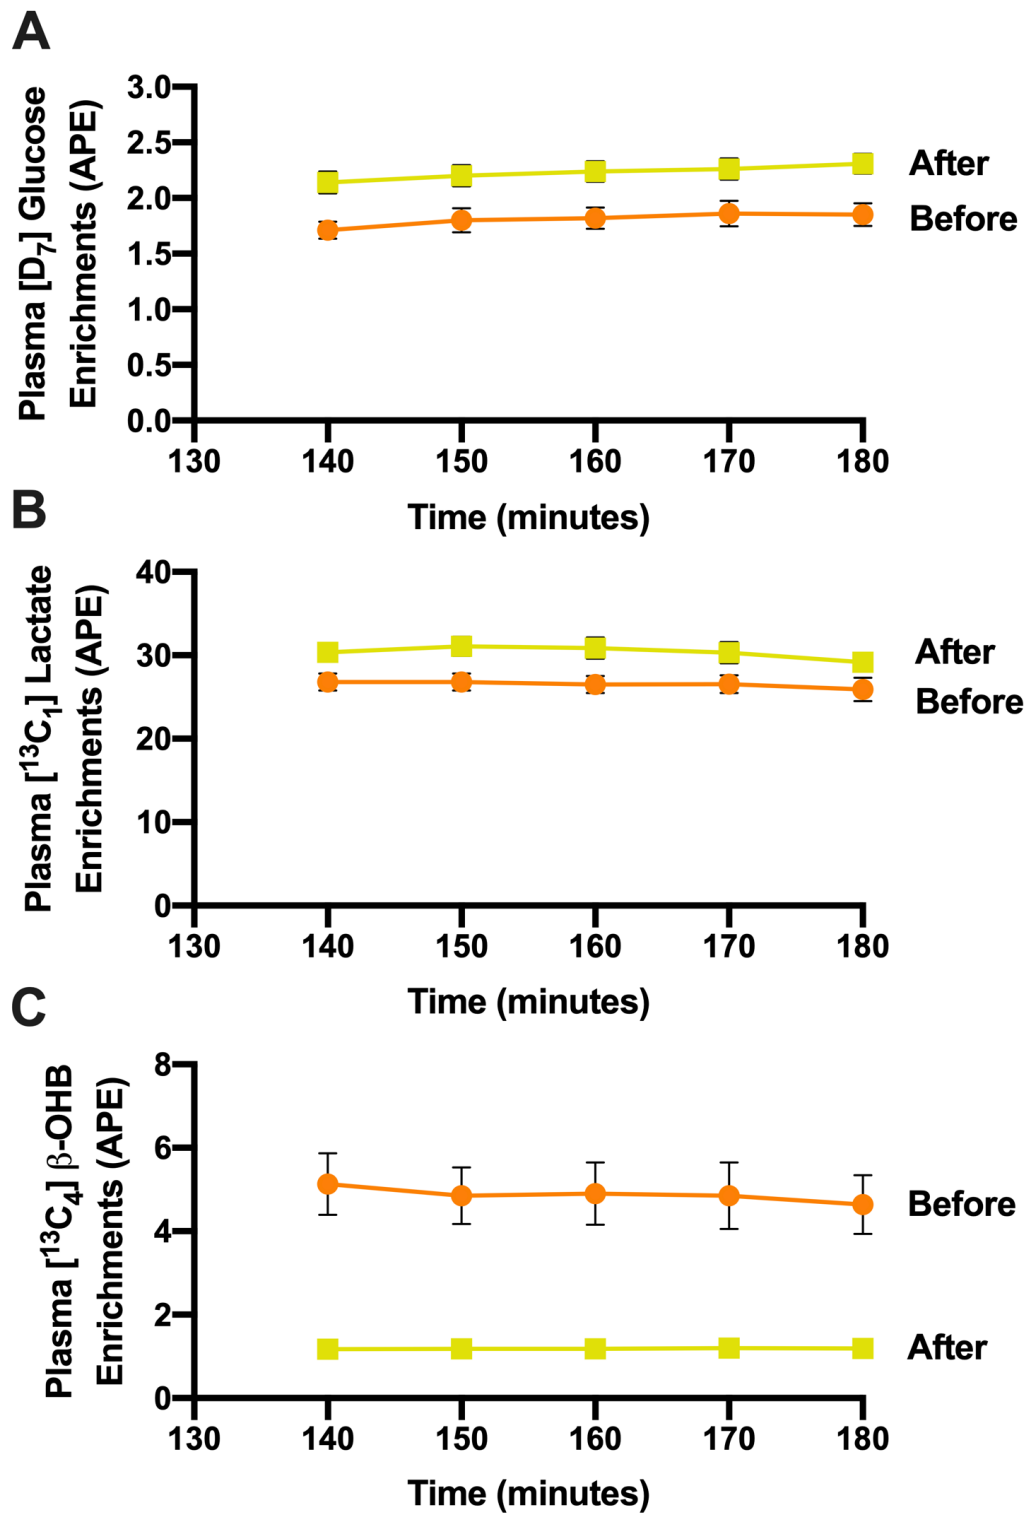

Figure S2. Steady-state plasma enrichments during PINTA before and after the 6-day ketogenic diet (n=10).

**Table S1.** Physical activity of the subjects assessed by accelerometry during the 6-day ketogenic diet.

|                                                        |             |
|--------------------------------------------------------|-------------|
| Accelerometer wear time (min/day)                      | 837 ± 26    |
| Energy expenditure during physical activity (kcal/day) | 524 ± 70    |
| Step count (n/day)                                     | 7241 ± 1068 |
| Sitting time (min/day)                                 | 476 ± 34    |
| Intensities of activity                                |             |
| - Sedentary (%)                                        | 68 ± 2      |
| - Light (%)                                            | 27 ± 2      |
| - Moderate (%)                                         | 4 ± 1       |

Data are in means ± SEM.
